# Supplementary material for: Developmental plasticity of the cardiovascular system in oviparous vertebrates: effects of chronic hypoxia and interactive stressors in the context of climate change
Source: PubMed Central journal article supplement (PMC11418206; doi:10.1242/jeb.245530), 2024-08-07
Supplement: jexbio-227-245530-s1.pdf [file jexbio-227-245530-s1.pdf]

**Table S1. Effects of chronic developmental hypoxia on body mass and cardiovascular parameters in avians, reptiles and fish**

| AVIANS                                                | Stage           | Body Temp (°C) | [O <sub>2</sub> ] Control | [O <sub>2</sub> ] Hypoxia | (A) Body mass                    |                | (B) Heart mass                                     |                | (C) Heart-body weight ratio           | (D) Heart rate     |              | (E) O <sub>2</sub> carrying capacity | (F) Mito capacity |              | (G) Cardiac Fibrosis |                 | (H) Sympathetic activity |              |
|-------------------------------------------------------|-----------------|----------------|---------------------------|---------------------------|----------------------------------|----------------|----------------------------------------------------|----------------|---------------------------------------|--------------------|--------------|--------------------------------------|-------------------|--------------|----------------------|-----------------|--------------------------|--------------|
|                                                       |                 |                |                           |                           | Emb                              | Juv or Adult   | Emb                                                | Juv or Adult   | Emb                                   | Emb                | Juv or Adult | Emb                                  | Emb               | Juv or Adult | Emb                  | Juv or Adult    | Emb                      | Juv or Adult |
| <b>Gallus gallus domesticus (leghorn): 20-21 days</b> | 1-6 doi         | 37.5           | 21%O <sub>2</sub>         | 15%O <sub>2</sub>         | ↓ <sup>1</sup><br>— <sup>2</sup> |                | — <sup>1,2</sup>                                   | — <sup>1</sup> |                                       |                    |              | — <sup>1</sup>                       |                   |              |                      |                 |                          |              |
|                                                       | 6-12 doi        | 37.5           | 21%O <sub>2</sub>         | 15%O <sub>2</sub>         | ↓ <sup>1</sup>                   |                | ↑ <sup>1</sup>                                     | — <sup>1</sup> |                                       |                    |              | ↑ <sup>1</sup>                       |                   |              |                      |                 |                          |              |
|                                                       | 6-19 doi        | 38             | 21%O <sub>2</sub>         | 15%O <sub>2</sub>         | ↓ <sup>3-7</sup>                 | — <sup>4</sup> | ↑ <sup>3</sup><br>— <sup>5</sup><br>↓ <sup>6</sup> |                | ↑ <sup>3,5</sup><br>— <sup>6</sup>    |                    |              |                                      | ↓ <sup>6</sup>    |              |                      |                 | ↑ <sup>7</sup>           |              |
|                                                       | 7-14            | 37.5           | 21%O <sub>2</sub>         | 15%O <sub>2</sub>         | ↓ <sup>8</sup>                   |                |                                                    |                |                                       |                    |              | ↑ <sup>8</sup>                       |                   |              |                      |                 |                          |              |
|                                                       | 12-18 doi       | 37.5           | 21%O <sub>2</sub>         | 15%O <sub>2</sub>         | ↓ <sup>1</sup>                   |                | — <sup>1</sup>                                     | — <sup>1</sup> |                                       |                    |              | — <sup>1</sup>                       |                   |              |                      |                 |                          |              |
|                                                       | 16-18 doi       | 37.5           | 21%O <sub>2</sub>         | 15%O <sub>2</sub>         | ↓ <sup>9</sup>                   |                | ↓ <sup>9</sup>                                     |                |                                       |                    |              |                                      |                   |              |                      |                 |                          |              |
|                                                       | 0-19 & 1-20 doi | 37.5           | 21%O <sub>2</sub>         | 15%O <sub>2</sub>         | ↓ <sup>10-16</sup>               |                | ↓ <sup>10,15</sup>                                 |                | — <sup>10</sup><br>↑ <sup>11,13</sup> | — <sup>14,16</sup> |              | ↑ <sup>12,15</sup>                   |                   |              |                      | ↑ <sup>15</sup> |                          |              |
|                                                       | 0-21 doi        | 37.5           | 21% O <sub>2</sub>        | 14% O <sub>2</sub>        | ↓ <sup>17,18</sup>               |                | ↓ <sup>17,18</sup>                                 |                |                                       |                    |              | ↑ <sup>17,18</sup>                   |                   |              |                      |                 |                          |              |
|                                                       | 1-21 doi        | 38             | 21%O <sub>2</sub>         | HB: 13%O <sub>2</sub>     | ↓ <sup>19</sup>                  |                |                                                    |                |                                       |                    |              |                                      |                   |              |                      |                 | ↑ <sup>19</sup>          |              |
|                                                       | 0-20 doi        | 38             | 21% O <sub>2</sub>        | HB: 13%O <sub>2</sub>     | ↓ <sup>20</sup>                  |                |                                                    |                |                                       |                    |              | ↑ <sup>20</sup>                      |                   |              |                      |                 |                          |              |

| AVIANS                                                     | Stage            | Body Temp (°C) | [O <sub>2</sub> ] Control | [O <sub>2</sub> ] Hypoxia | (A) Body mass      |                                    | (B) Heart mass  |                 | (C) Heart-body weight ratio | (D) Heart rate  |              | (E) O <sub>2</sub> carrying capacity |                 | (F) Mito capacity |     | (G) Cardiac Fibrosis |                 | (H) Sympathetic activity |                                    |
|------------------------------------------------------------|------------------|----------------|---------------------------|---------------------------|--------------------|------------------------------------|-----------------|-----------------|-----------------------------|-----------------|--------------|--------------------------------------|-----------------|-------------------|-----|----------------------|-----------------|--------------------------|------------------------------------|
|                                                            |                  |                |                           |                           | Emb                | Juv or Adult                       | Emb             | Juv or Adult    | Emb                         | Emb             | Juv or Adult | Emb                                  | Emb             | Juv or Adult      | Emb | Juv or Adult         | Emb             | Juv or Adult             |                                    |
| <b>Gallus gallus domesticus (bovans brown): 20-21 days</b> | 1-21 doi         | 37.9           | 21%O <sub>2</sub>         | 14%O <sub>2</sub>         | ↓ <sup>21,23</sup> | ↓ <sup>23</sup>                    | ↑ <sup>21</sup> |                 | — <sup>21</sup>             |                 |              | ↑ <sup>22,23</sup>                   | ↓ <sup>22</sup> |                   |     |                      |                 |                          | ↑ <sup>23</sup>                    |
| <b>Gallus gallus domesticus (broiler): 20-21 days</b>      | 1-21 or 0-19 doi | 37.8           | 21%O <sub>2</sub>         | 14%O <sub>2</sub>         | ↓ <sup>24,26</sup> | — <sup>24</sup><br>↓ <sup>25</sup> | — <sup>25</sup> | — <sup>25</sup> | ↑ <sup>24</sup>             | — <sup>26</sup> |              |                                      |                 |                   |     |                      | — <sup>25</sup> | ↑ <sup>24,26</sup>       | ↓ <sup>24</sup><br>↑ <sup>25</sup> |
|                                                            | 1-20 doi         | 37.8           | 21%O <sub>2</sub>         | 15%O <sub>2</sub>         | ↓ <sup>10</sup>    |                                    | ↓ <sup>10</sup> |                 | ↓ <sup>10</sup>             |                 |              |                                      |                 |                   |     |                      |                 |                          |                                    |
|                                                            | 6-19 doi         | 37.8           | 21%O <sub>2</sub>         | 15%O <sub>2</sub>         | ↓ <sup>4</sup>     | ↓ <sup>4</sup>                     | ↑ <sup>4</sup>  |                 |                             |                 |              |                                      |                 |                   |     |                      |                 |                          |                                    |
|                                                            | 9-19             | 37.8           | 21%O <sub>2</sub>         | 17%O <sub>2</sub>         | — <sup>27</sup>    |                                    | — <sup>27</sup> |                 |                             |                 |              |                                      |                 |                   |     |                      |                 |                          |                                    |
|                                                            |                  | 38.9           | 21%O <sub>2</sub>         | 17%O <sub>2</sub>         | — <sup>27</sup>    |                                    | — <sup>27</sup> |                 |                             |                 |              |                                      |                 |                   |     |                      |                 |                          |                                    |
| <b>Gallus gallus (red junglefowl): 19-21 days</b>          | 1-20 doi         | 37.8           | 21%O <sub>2</sub>         | 15%O <sub>2</sub>         | ↓ <sup>10</sup>    |                                    | ↓ <sup>10</sup> |                 | ↓ <sup>10</sup>             |                 |              |                                      |                 |                   |     |                      |                 |                          |                                    |
| <b>Branta canadensis (Canada goose) 28 days</b>            | 0-28             | 37             | 16%O <sub>2</sub>         | 12%O <sub>2</sub>         | — <sup>28,29</sup> |                                    |                 |                 |                             |                 |              | ↑ <sup>29</sup>                      |                 |                   |     |                      |                 |                          |                                    |
| <b>Anser indicus (bar-headed goose): 27-30 days</b>        | 0-28             | 37             | 16%O <sub>2</sub>         | 12%O <sub>2</sub>         | — <sup>28</sup>    |                                    |                 |                 |                             |                 |              |                                      |                 |                   |     |                      |                 |                          |                                    |

| REPTILES                                                                  | Stage | Body Temp (°C) | [O <sub>2</sub> ] Control | [O <sub>2</sub> ] Hypoxia | (A) Body mass                         |                                          | (B) Heart mass     |              | (C) Heart-body weight ratio              | (D) Heart rate                        |                 | (E) O <sub>2</sub> carrying capacity | (F) Mito capacity |                 | (G) Cardiac Fibrosis |              | (H) Sympathetic activity |              |
|---------------------------------------------------------------------------|-------|----------------|---------------------------|---------------------------|---------------------------------------|------------------------------------------|--------------------|--------------|------------------------------------------|---------------------------------------|-----------------|--------------------------------------|-------------------|-----------------|----------------------|--------------|--------------------------|--------------|
|                                                                           |       |                |                           |                           | Emb                                   | Juv or Adult                             | Emb                | Juv or Adult | Emb                                      | Emb                                   | Juv or Adult    | Emb                                  | Emb               | Juv or Adult    | Emb                  | Juv or Adult | Emb                      | Juv or Adult |
| <b>American alligator (<i>Alligator mississippiensis</i>): 63-68 days</b> | 0-90% | 30             | 21%O <sub>2</sub>         | 10%O <sub>2</sub>         | ↓ <sup>30,34</sup>                    | — <sup>35-37</sup><br>↓ <sup>38,39</sup> | — <sup>30,31</sup> |              | ↑ <sup>30,31</sup>                       | ↓ <sup>30,33,34</sup>                 | — <sup>35</sup> | ↑ <sup>40</sup>                      | — <sup>38</sup>   | ↑ <sup>38</sup> |                      |              |                          |              |
|                                                                           | 0-80% | 30             | 21%O <sub>2</sub>         | 10%O <sub>2</sub>         | ↓ <sup>30,34</sup>                    |                                          | — <sup>30</sup>    |              | ↑ <sup>30</sup>                          | ↓ <sup>34</sup><br>— <sup>30</sup>    |                 |                                      |                   |                 |                      |              |                          |              |
|                                                                           | 0-70% | 30             | 21%O <sub>2</sub>         | 10%O <sub>2</sub>         | — <sup>30</sup><br>↓ <sup>33,34</sup> |                                          | — <sup>30</sup>    |              | — <sup>30</sup>                          | — <sup>30</sup><br>↓ <sup>33,34</sup> |                 |                                      |                   |                 |                      |              | ↑ <sup>34</sup>          |              |
|                                                                           | 0-60% | 30             | 21%O <sub>2</sub>         | 15%O <sub>2</sub>         | — <sup>30</sup>                       |                                          | — <sup>30</sup>    |              | — <sup>30</sup>                          | — <sup>30</sup>                       |                 |                                      |                   |                 |                      |              |                          |              |
|                                                                           | 0-90% | 30             | 21%O <sub>2</sub>         | 15%O <sub>2</sub>         | — <sup>30</sup>                       |                                          | — <sup>30</sup>    |              | — <sup>30</sup>                          | — <sup>30</sup>                       |                 |                                      |                   |                 |                      |              |                          |              |
|                                                                           | 0-80% | 30             | 21%O <sub>2</sub>         | 15%O <sub>2</sub>         | — <sup>30</sup>                       |                                          | — <sup>30</sup>    |              | — <sup>30</sup>                          | — <sup>30</sup>                       |                 |                                      |                   |                 |                      |              |                          |              |
|                                                                           | 0-70% | 30             | 21%O <sub>2</sub>         | 15%O <sub>2</sub>         | — <sup>30</sup>                       |                                          | — <sup>30</sup>    |              | — <sup>30</sup>                          | — <sup>30</sup>                       |                 |                                      |                   |                 |                      |              |                          |              |
|                                                                           | 0-60% | 30             | 21%O <sub>2</sub>         | 15%O <sub>2</sub>         | — <sup>30</sup>                       |                                          | — <sup>30</sup>    |              | — <sup>30</sup>                          | — <sup>30</sup>                       |                 |                                      |                   |                 |                      |              |                          |              |
| <b>Snapping turtle (<i>Chelydra serpentina</i>): 80-90 days</b>           | 0-90% | 30             | 21%O <sub>2</sub>         | 10%O <sub>2</sub>         | ↓ <sup>41-43</sup>                    | ↓ <sup>44</sup><br>— <sup>45-47</sup>    | ↑ <sup>43</sup>    |              | ↑ <sup>41-43,48</sup>                    | — <sup>41</sup><br>↑ <sup>42</sup>    |                 | ↑ <sup>49</sup>                      |                   | ↑ <sup>47</sup> |                      |              | ↑ <sup>42</sup>          |              |
|                                                                           | 0-70% | 30             | 21%O <sub>2</sub>         | 10%O <sub>2</sub>         | ↓ <sup>41-43</sup>                    |                                          | — <sup>43</sup>    |              | ↑ <sup>41,42,48</sup><br>— <sup>43</sup> | — <sup>41,42</sup>                    |                 |                                      |                   | ↑ <sup>38</sup> |                      |              | ↑ <sup>42</sup>          |              |

| REPTILES                                                  | Stage   | Body Temp (°C) | [O <sub>2</sub> ] Control | [O <sub>2</sub> ] Hypoxia | (A) Body mass   |              | (B) Heart mass  |              | (C) Heart-body weight ratio | (D) Heart rate |                    | (E) O <sub>2</sub> carrying capacity | (F) Mito capacity |                 | (G) Cardiac Fibrosis |              | (H) Sympathetic activity |              |
|-----------------------------------------------------------|---------|----------------|---------------------------|---------------------------|-----------------|--------------|-----------------|--------------|-----------------------------|----------------|--------------------|--------------------------------------|-------------------|-----------------|----------------------|--------------|--------------------------|--------------|
|                                                           |         |                |                           |                           | Emb             | Juv or Adult | Emb             | Juv or Adult | Emb                         | Emb            | Juv or Adult       | Emb                                  | Emb               | Juv or Adult    | Emb                  | Juv or Adult | Emb                      | Juv or Adult |
| Florida red-bellied turtle (Pseudemys Nelson): 45-80 days | 0-90%   | 30             | 21%O <sub>2</sub>         | 10%O <sub>2</sub>         | ↓ <sup>49</sup> |              | — <sup>49</sup> |              | ↑ <sup>49</sup>             |                |                    | ↑ <sup>49</sup>                      |                   |                 |                      |              |                          |              |
| Leopard gecko (Eublepharis macularius): 45-53 days        | 0-70%   | 34             | 21%O <sub>2</sub>         | Regional hypoxia          | ↓ <sup>50</sup> |              | ↓ <sup>50</sup> |              | ↑ <sup>50</sup>             |                |                    |                                      |                   | ↑ <sup>38</sup> |                      |              |                          |              |
|                                                           | 0-70%   | 28             | 21%O <sub>2</sub>         | Regional hypoxia          | ↓ <sup>50</sup> |              | ↓ <sup>50</sup> |              | ↑ <sup>50</sup>             |                |                    |                                      |                   |                 |                      |              |                          |              |
| Banded red snake (Lycodon rufozonatu): 50 days            | 10-100% | 28             | 21%O <sub>2</sub>         | Regional hypoxia          | — <sup>51</sup> |              |                 |              | ↑ <sup>51</sup>             |                |                    |                                      |                   |                 |                      |              |                          |              |
| Chinese softshell turtle (Pelodiscus sinensis): 60 days   | 0-100%  | 28             | 21%O <sub>2</sub>         | Regional hypoxia          | — <sup>51</sup> |              |                 |              | — <sup>51</sup>             |                |                    |                                      |                   |                 |                      |              |                          |              |
| Common wall lizard (Podarcis muralis): 42-77 days         | 0-100%  | 24             | 21%O <sub>2</sub>         | HB 15%O <sub>2</sub>      | ↓ <sup>52</sup> |              | ↑ <sup>52</sup> |              |                             |                | ↓ <sup>52,53</sup> |                                      |                   |                 |                      |              |                          |              |
|                                                           | 0-100%  | 24             | 21%O <sub>2</sub>         | HB 17%O <sub>2</sub>      | — <sup>53</sup> |              |                 |              |                             |                | ↓ <sup>53</sup>    |                                      |                   |                 |                      |              |                          |              |

|                                                         |              |                       |                                |                                |                      |                     |                       |                     |                                    |                       |                     |                                            |                          |                     |                             |                     |                                 |                     |
|---------------------------------------------------------|--------------|-----------------------|--------------------------------|--------------------------------|----------------------|---------------------|-----------------------|---------------------|------------------------------------|-----------------------|---------------------|--------------------------------------------|--------------------------|---------------------|-----------------------------|---------------------|---------------------------------|---------------------|
| <b>Viperine snake<br/>(<i>Natrix maura</i>)</b>         | 0-100%       | 24                    | 21%O <sub>2</sub>              | HB<br>15%O <sub>2</sub>        | — <sup>54</sup>      |                     |                       |                     |                                    | — <sup>54</sup>       |                     |                                            |                          |                     |                             |                     |                                 |                     |
|                                                         | 0-100%       | 28                    | 21%O <sub>2</sub>              | HB<br>15%O <sub>2</sub>        | ↓ <sup>55</sup>      |                     |                       |                     |                                    | ↑ <sup>55</sup>       |                     |                                            |                          |                     |                             |                     |                                 |                     |
|                                                         | 0-100%       | 32                    | 21%O <sub>2</sub>              | HB<br>15%O <sub>2</sub>        | ↓ <sup>54</sup>      |                     |                       |                     |                                    | ↓ <sup>54</sup>       |                     |                                            |                          |                     |                             |                     |                                 |                     |
| <b>Class and species</b>                                | <b>Stage</b> | <b>Body Temp (°C)</b> | <b>[O<sub>2</sub>] Control</b> | <b>[O<sub>2</sub>] Hypoxia</b> | <b>(A) Body mass</b> |                     | <b>(B) Heart mass</b> |                     | <b>(C) Heart-body weight ratio</b> | <b>(D) Heart rate</b> |                     | <b>(E) O<sub>2</sub> carrying capacity</b> | <b>(F) Mito capacity</b> |                     | <b>(G) Cardiac Fibrosis</b> |                     | <b>(H) Sympathetic activity</b> |                     |
| <b>FISH</b>                                             |              |                       |                                |                                | <b>Emb</b>           | <b>Juv or Adult</b> | <b>Emb</b>            | <b>Juv or Adult</b> | <b>Emb</b>                         | <b>Emb</b>            | <b>Juv or Adult</b> | <b>Emb</b>                                 | <b>Emb</b>               | <b>Juv or Adult</b> | <b>Emb</b>                  | <b>Juv or Adult</b> | <b>Emb</b>                      | <b>Juv or Adult</b> |
| <b>Zebrafish<br/>(<i>Danio rerio</i>):<br/>3-4 days</b> | 0-2 dpf      | 25                    | 6.5 mg/L                       | 0.8 mg/L                       |                      |                     |                       |                     |                                    | ↓ <sup>56</sup>       |                     |                                            |                          |                     |                             |                     |                                 |                     |
|                                                         | 1-5 dpf      | 25                    | 7.5 mg/L                       | 3.8 mg/L                       | — <sup>57</sup>      |                     | ↑ <sup>57</sup>       |                     |                                    | ↑ <sup>57</sup>       |                     |                                            |                          |                     |                             |                     |                                 |                     |
|                                                         | 0-1 dpf      | 28                    | 7.5 mg/L                       | 4.3 mg/L                       | — <sup>58</sup>      | ↓ <sup>58</sup>     |                       |                     |                                    | — <sup>58</sup>       |                     |                                            |                          |                     |                             |                     |                                 |                     |
|                                                         | 0-1 dpf      | 28                    | 6.5 mg/L                       | 0.6 mg/L                       | ↓ <sup>59</sup>      |                     |                       |                     |                                    |                       |                     |                                            |                          |                     |                             |                     |                                 |                     |
|                                                         | 2-4 dpf      | 28                    | 100%                           | 5%                             |                      |                     |                       |                     |                                    |                       |                     |                                            | ↓ <sup>60</sup>          |                     |                             |                     |                                 |                     |
|                                                         | 0-4 dpf      | 28                    | 6 mg/L                         | 1-2 mg/L                       |                      |                     | ↓ <sup>61,62</sup>    |                     |                                    | ↓ <sup>61,62</sup>    |                     |                                            |                          |                     |                             |                     |                                 |                     |
|                                                         | 1-15 dpf     | 28                    | 7.5 mg/L                       | 3.3 mg/L                       | ↓ <sup>63</sup>      |                     |                       |                     |                                    |                       |                     | ↑ <sup>63</sup>                            |                          |                     |                             |                     |                                 |                     |
|                                                         | 1-5 dpf      | 28                    | 7.5 mg/L                       | 3.8 mg/L                       | — <sup>57</sup>      |                     | ↑ <sup>57</sup>       |                     |                                    | ↑ <sup>57</sup>       |                     |                                            |                          |                     |                             |                     |                                 |                     |
|                                                         | 5-9 dpf      | 28                    | 7.5 mg/L                       | 1.5 mg/L                       |                      |                     |                       |                     |                                    | ↓ <sup>64</sup>       |                     |                                            |                          |                     |                             |                     | ↑ <sup>64</sup>                 |                     |
|                                                         | 1-5 dpf      | 28                    | 7.5 mg/L                       | 1.5 mg/L                       |                      |                     | ↑ <sup>65</sup>       |                     |                                    | ↓ <sup>65</sup>       |                     | ↑ <sup>65</sup>                            |                          |                     |                             |                     |                                 |                     |
|                                                         | 1-10 dpf     | 28                    | 7.5 mg/L                       | 1.5 mg/L                       |                      |                     | ↑ <sup>65</sup>       |                     |                                    | ↑ <sup>65</sup>       |                     | ↑ <sup>65</sup>                            |                          |                     |                             |                     |                                 |                     |
|                                                         | 0-10 dpf     | 28                    | 7.5 mg/L                       | 1.5 – 1.9 mg/L                 |                      |                     |                       |                     |                                    | ↓ <sup>66</sup>       |                     |                                            |                          |                     |                             |                     |                                 |                     |
|                                                         | 0-12 dpf     | 25                    | 6.5 mg/L                       | 0.8 mg/L                       |                      |                     |                       |                     |                                    | ↓ <sup>56</sup>       |                     |                                            |                          |                     |                             |                     |                                 |                     |

| Class and species                                                          | Stage     | Body Temp (°C) | [O <sub>2</sub> ] Control | [O <sub>2</sub> ] Hypoxia | (A) Body mass   |                 | (B) Heart mass  |              | (C) Heart-body weight ratio | (D) Heart rate  |                 | (E) O <sub>2</sub> carrying capacity | (F) Mito capacity |     | (G) Cardiac Fibrosis |     | (H) Sympathetic activity |     |
|----------------------------------------------------------------------------|-----------|----------------|---------------------------|---------------------------|-----------------|-----------------|-----------------|--------------|-----------------------------|-----------------|-----------------|--------------------------------------|-------------------|-----|----------------------|-----|--------------------------|-----|
|                                                                            |           |                |                           |                           | Emb             | Juv or Adult    | Emb             | Juv or Adult |                             | Emb             | Emb             |                                      | Juv or Adult      | Emb | Juv or Adult         | Emb | Juv or Adult             | Emb |
| <b>FISH</b>                                                                |           |                |                           |                           |                 |                 |                 |              |                             |                 |                 |                                      |                   |     |                      |     |                          |     |
|                                                                            | 0-3 dpf   | 28             | 7.5 mg/L                  | 1.5 – 1.9 mg/L            |                 |                 |                 |              |                             | ↓ <sup>66</sup> |                 |                                      |                   |     |                      |     |                          |     |
|                                                                            | 0-30 dpf  | 28             | 7.5 mg /L                 | 4.3 mg /L                 | — <sup>58</sup> | ↓ <sup>58</sup> |                 |              |                             | ↑ <sup>58</sup> |                 |                                      |                   |     |                      |     |                          |     |
|                                                                            | 1-5 dpf   | 31             | 7.5 mg/L                  | 3.8 mg/L                  | — <sup>57</sup> |                 | ↑ <sup>57</sup> |              |                             | ↑ <sup>57</sup> |                 |                                      |                   |     |                      |     |                          |     |
|                                                                            |           |                |                           |                           |                 |                 |                 |              |                             |                 |                 |                                      |                   |     |                      |     |                          |     |
| <b>Rainbow trout (<i>Oncorhynchus mykiss</i>): 60-90 days</b>              | 25-36 dpf | 10             | 10 mg /L                  | 5 mg /L                   | ↓ <sup>67</sup> |                 |                 |              |                             |                 |                 |                                      |                   |     |                      |     |                          |     |
|                                                                            | 0-57 dpf  | 11             | 100%                      | 34%                       | ↓ <sup>68</sup> | ↑ <sup>68</sup> |                 |              |                             |                 |                 |                                      |                   |     |                      |     |                          |     |
|                                                                            | 0-45 dpf  | 10             | 100%                      | 30%                       | ↓ <sup>69</sup> |                 |                 |              |                             |                 | ↑ <sup>69</sup> |                                      |                   |     |                      |     |                          |     |
|                                                                            |           |                |                           |                           |                 |                 |                 |              |                             |                 |                 |                                      |                   |     |                      |     |                          |     |
| <b>Chinook salmon (<i>Oncorhynchus tshawytsch</i>): 90-150 days</b>        | 0-1 dph   | 10             | 10 mg /L                  | 5.5 mg /L                 |                 | ↓ <sup>70</sup> |                 |              |                             |                 |                 |                                      |                   |     |                      |     |                          |     |
|                                                                            | 0-1 dph   | 15             | 10 mg /L                  | 5.5 mg /L                 |                 | ↓ <sup>70</sup> |                 |              |                             |                 |                 |                                      |                   |     |                      |     |                          |     |
|                                                                            |           |                |                           |                           |                 |                 |                 |              |                             |                 |                 |                                      |                   |     |                      |     |                          |     |
| <b>Small-spotted catshark (<i>Scyliorhinus canicula</i>): 240-270 days</b> | 0-28 wpf  | 15 and 20      | 100% air sat              | 50% air sat               | — <sup>71</sup> |                 |                 |              |                             |                 |                 |                                      |                   |     |                      |     |                          |     |
|                                                                            |           |                |                           |                           |                 |                 |                 |              |                             |                 |                 |                                      |                   |     |                      |     |                          |     |
| <b>Grass carp (<i>Ctenopharyngodon idellus</i>): 1-3 days</b>              | 0-1 dpf   | 22             | 7.0 mg/L                  | 1.0 mg/L                  | ↓ <sup>72</sup> |                 |                 |              |                             |                 |                 |                                      |                   |     |                      |     |                          |     |

| Class and species                                             | Stage     | Body Temp (°C) | [O <sub>2</sub> ] Control | [O <sub>2</sub> ] Hypoxia | (A) Body mass   |                 | (B) Heart mass | (C) Heart-body weight ratio |     | (D) Heart rate |     | (E) O <sub>2</sub> carrying capacity | (F) Mito capacity |              | (G) Cardiac Fibrosis |              | (H) Sympathetic activity |              |
|---------------------------------------------------------------|-----------|----------------|---------------------------|---------------------------|-----------------|-----------------|----------------|-----------------------------|-----|----------------|-----|--------------------------------------|-------------------|--------------|----------------------|--------------|--------------------------|--------------|
|                                                               |           |                |                           |                           | Emb             | Juv or Adult    | Emb            | Juv or Adult                | Emb | Juv or Adult   | Emb | Juv or Adult                         | Emb               | Juv or Adult | Emb                  | Juv or Adult | Emb                      | Juv or Adult |
| <b>European seabass (<i>Dicentrarchus labrax</i>): 9 days</b> | 28-50 dph | 15             | 7.35 mg/L                 | 2.95 mg/L                 | — <sup>73</sup> | ↓ <sup>73</sup> |                |                             |     |                |     |                                      |                   |              |                      |              |                          |              |
|                                                               | 28-50 dph | 20             | 7.35 mg/L                 | 2.95 mg/L                 | — <sup>73</sup> | — <sup>73</sup> |                |                             |     |                |     |                                      |                   |              |                      |              |                          |              |
|                                                               | 30-38 dph | 19             | 9.3 mg/L                  | 3,7 mg/L                  |                 | ↓ <sup>74</sup> |                |                             |     |                |     |                                      |                   |              |                      |              |                          |              |
| <b>Atlantic salmon (<i>Salmo salar</i>): 57-75 days</b>       | 0-100 dpf | 8              | 11.9 mg/L                 | 5.96 mg/L                 |                 | — <sup>75</sup> |                |                             |     |                |     |                                      |                   |              |                      |              |                          |              |

Abbreviations: HB, hypobaric hypoxic; dpf, days post fertilisation; dph, days post hatch; wpf, weeks post-fertilisation; di, days of incubation; %O<sub>2</sub>, % oxygen saturation. Average gestation period for each species is given for each species in column 1.

**Table S2. Effects of chronic developmental hypoxia on mammalian body mass and cardiovascular parameters**

| MAMMALS                                                | Stage (GD) | Body Temp (°C) | [O <sub>2</sub> ] Control | [O <sub>2</sub> ] Hypoxia   | (A) Body mass      |                 | (B) Heart mass     |                 | (C) Heart-body weight ratio | (D) Heart rate  |                 | (E) O <sub>2</sub> carrying capacity | (F) Mito capacity                  |                                       | (G) Cardiac Fibrosis |                 | (H) Sympathetic activity |                 |
|--------------------------------------------------------|------------|----------------|---------------------------|-----------------------------|--------------------|-----------------|--------------------|-----------------|-----------------------------|-----------------|-----------------|--------------------------------------|------------------------------------|---------------------------------------|----------------------|-----------------|--------------------------|-----------------|
|                                                        |            |                |                           |                             | Fetal              | Juv or Adult    | Fetal              | Juv or Adult    | Fetal                       | Fetal           | Juv or Adult    | Fetal                                | Fetal                              | Juv or Adult                          | Fetal                | Juv or Adult    | Fetal                    | Juv or Adult    |
| <b>Rat (<i>Rattus norvegicus</i>): 21-23 days</b>      | 6-20       | 37             | 21%O <sub>2</sub>         | 13%O <sub>2</sub>           | — <sup>76-78</sup> | — <sup>77</sup> | — <sup>76,77</sup> | — <sup>77</sup> | — <sup>76,77</sup>          |                 | — <sup>77</sup> | ↑ <sup>78</sup>                      | ↓ <sup>79</sup><br>— <sup>79</sup> |                                       |                      |                 |                          | ↑ <sup>77</sup> |
|                                                        | 10-20      | 37             | 21%O <sub>2</sub>         | 12%O <sub>2</sub>           |                    |                 |                    |                 |                             | — <sup>80</sup> |                 |                                      |                                    |                                       |                      |                 |                          | ↑ <sup>80</sup> |
|                                                        | 15-20      | 37             | 21%O <sub>2</sub>         | 10%O <sub>2</sub>           | ↓ <sup>81,82</sup> | — <sup>81</sup> | — <sup>82</sup>    | — <sup>82</sup> | — <sup>82</sup>             |                 | — <sup>81</sup> | ↑ <sup>82</sup>                      |                                    |                                       |                      |                 |                          |                 |
|                                                        | 15-21      | 37             | 21%O <sub>2</sub>         | 10.5%O <sub>2</sub>         | ↓ <sup>83</sup>    |                 | — <sup>83</sup>    |                 | ↑ <sup>83</sup>             |                 |                 |                                      |                                    |                                       |                      | ↑ <sup>83</sup> |                          |                 |
|                                                        | 15-21      | 37             | 21%O <sub>2</sub>         | 12%O <sub>2</sub>           | ↓ <sup>84,85</sup> |                 | — <sup>85</sup>    |                 |                             | — <sup>85</sup> |                 |                                      |                                    |                                       |                      | ↑ <sup>85</sup> |                          |                 |
|                                                        | 15-21      | 37             | 21%O <sub>2</sub>         | 11%O <sub>2</sub>           | ↓ <sup>86</sup>    | — <sup>86</sup> | ↑ <sup>86</sup>    |                 | ↑ <sup>86</sup>             |                 |                 |                                      |                                    |                                       |                      |                 | ↑ <sup>86</sup>          |                 |
| <b>Mouse (<i>Mus musculus</i>): 19-21 days</b>         | 14-20      | 37             | 21%O <sub>2</sub>         | 12%O <sub>2</sub>           | ↓ <sup>87</sup>    | — <sup>87</sup> |                    |                 |                             |                 |                 |                                      |                                    |                                       |                      |                 | ↑ <sup>87</sup>          |                 |
|                                                        | 6-18       | 37             | 21%O <sub>2</sub>         | 14%O <sub>2</sub>           |                    |                 |                    |                 |                             |                 |                 |                                      | ↑ <sup>88</sup><br>↓ <sup>88</sup> |                                       |                      |                 |                          |                 |
| <b>Guinea pig (<i>Cavia porcellus</i>): 59-72 days</b> | 58-70      | 38             | 21%O <sub>2</sub>         | 12%O <sub>2</sub>           | — <sup>89</sup>    |                 |                    |                 |                             |                 |                 |                                      |                                    |                                       |                      |                 |                          |                 |
|                                                        | 49-63      | 38             | 21%O <sub>2</sub>         | 10.5%O <sub>2</sub>         | ↓ <sup>90</sup>    |                 | — <sup>90</sup>    |                 | ↑ <sup>90</sup>             |                 |                 |                                      |                                    |                                       | ↑ <sup>90</sup>      |                 |                          |                 |
|                                                        | 35-60      | 38             |                           | Uterine Artery Constriction | — <sup>91</sup>    | ↓ <sup>91</sup> |                    |                 |                             |                 |                 |                                      |                                    |                                       |                      |                 |                          |                 |
|                                                        | 25-64      | 38             | 21%O <sub>2</sub>         | 10%O <sub>2</sub>           | ↓ <sup>92</sup>    |                 |                    |                 |                             |                 |                 |                                      | ↑ <sup>92</sup><br>↓ <sup>92</sup> |                                       |                      |                 |                          |                 |
|                                                        | 50-64      | 38             | 21%O <sub>2</sub>         | 10.5%O <sub>2</sub>         | ↓ <sup>92</sup>    |                 |                    |                 |                             |                 |                 |                                      | — <sup>93</sup><br>↓ <sup>92</sup> | ↓ <sup>94,95</sup><br>— <sup>95</sup> |                      |                 |                          |                 |



**Table S3. Common pathological cardiovascular signatures in juvenile and adult vertebrates that were exposed to chronic developmental hypoxia**

| Pathological signatures observed in mammals from hypoxic pregnancies                                                                                                                                                                                                                                                                                                                                                  | Birds                              | Crocodylians                  | Squamates and testudines   | Fish                          |
|-----------------------------------------------------------------------------------------------------------------------------------------------------------------------------------------------------------------------------------------------------------------------------------------------------------------------------------------------------------------------------------------------------------------------|------------------------------------|-------------------------------|----------------------------|-------------------------------|
| <b>Catch up growth</b> <sup>81,84,96-100</sup>                                                                                                                                                                                                                                                                                                                                                                        | Yes <sup>4,24</sup> (2/5)          | Yes <sup>35-37</sup> (3/5)    | Yes <sup>45-47</sup> (3/4) | Yes <sup>68,73,75</sup> (3/9) |
| <b>Increased heart/body weight ratio</b> <sup>85</sup>                                                                                                                                                                                                                                                                                                                                                                | Yes <sup>3,5,11,13,24</sup> (5/10) | Yes <sup>35-39</sup> (4/4)    | Yes <sup>46,47</sup> (2/3) | Unknown                       |
| <b>Fibrosis</b> <sup>85,101,102</sup>                                                                                                                                                                                                                                                                                                                                                                                 | Yes <sup>15</sup> (1/2)            | Unknown                       | Unknown                    | Unknown                       |
| <b>Ventricular wall thinning</b> <sup>99</sup>                                                                                                                                                                                                                                                                                                                                                                        | Yes <sup>15</sup> (1/2)            | Unknown                       | Unknown                    | Unknown                       |
| <b>Ventricular wall thickening</b> <sup>103</sup>                                                                                                                                                                                                                                                                                                                                                                     | Yes <sup>23,104</sup> (1/3)        | Unknown                       | Unknown                    | Unknown                       |
| <b>Aortic wall thickening</b> <sup>105</sup>                                                                                                                                                                                                                                                                                                                                                                          | Unknown                            | Unknown                       | No <sup>106</sup> (1/1)    | Unknown                       |
| <b>Systemic hypertension</b> <sup>22,80,100,102,105,107</sup>                                                                                                                                                                                                                                                                                                                                                         | Yes <sup>23</sup> (1/1)            | No <sup>108</sup> (1/1)       | No <sup>44,106</sup> (2/2) | Unknown                       |
| <b>Enhanced Sympathetic tone</b> <sup>96,98,109</sup>                                                                                                                                                                                                                                                                                                                                                                 | Yes <sup>24</sup> (1/1)            | Yes <sup>35,36</sup> (2/2)    | Unknown                    | Unknown                       |
| <b>Mitochondrial dysfunction</b> <sup>88,94,95,107</sup>                                                                                                                                                                                                                                                                                                                                                              | Unknown                            | No <sup>38</sup> (1/1)        | No <sup>45,47</sup> (2/2)  | Unknown                       |
| <b>Increased sensitivity to hypoxia, anoxia or ischemia</b> <sup>80,81,85,98,109-111</sup>                                                                                                                                                                                                                                                                                                                            | Unknown                            | No <sup>36,37,108</sup> (3/3) | No <sup>46,112</sup> (2/2) | Unknown                       |
| <b>Diastolic dysfunction</b> <sup>85,103,109</sup>                                                                                                                                                                                                                                                                                                                                                                    | Yes <sup>15</sup> (1/3)            | No <sup>36,39</sup> (2/2)     | Unknown                    | Unknown                       |
| <b>Systolic dysfunction</b> <sup>107</sup>                                                                                                                                                                                                                                                                                                                                                                            | Yes <sup>15,24</sup> (2/3)         | No <sup>36,39</sup> (2/2)     | Unknown                    | Unknown                       |
| <b>Enhanced contractility</b> <sup>96,109</sup>                                                                                                                                                                                                                                                                                                                                                                       | Yes <sup>23</sup> (1/2)            | No <sup>36</sup> (1/1)        | Unknown                    | Unknown                       |
| <b>Pulmonary hypertension</b> <sup>103,113,114</sup>                                                                                                                                                                                                                                                                                                                                                                  | Unknown                            | Unknown                       | No <sup>106</sup> (1/1)    | Unknown                       |
| <i>References in first column are from mammalian studies of chronic developmental hypoxia (CDH). Red and green colours indicate the presence or absence of the response, respectively. Grey colour indicates that the parameter has yet to be studied in this vertebrate class. Fractions in brackets indicate the percentage of papers that found the result (e.g. 1/3 = one in three papers found this result).</i> |                                    |                               |                            |                               |

- 1 Dzialowski, E. M., von Plettenberg, D., Elmonoufy, N. A. & Burggren, W. W. Chronic hypoxia alters the physiological and morphological trajectories of developing chicken embryos. *Comparative Biochemistry and Physiology Part A: Molecular & Integrative Physiology* **131**, 713-724 (2002).
- 2 Chan, T. & Burggren, W. Hypoxic incubation creates differential morphological effects during specific developmental critical windows in the embryo of the chicken (*Gallus gallus*). *Respir Physiol Neurobiol* **145**, 251-263 (2005). <https://doi.org/10.1016/j.resp.2004.09.005>
- 3 Villamor, E. *et al.* Chronic in ovo hypoxia decreases pulmonary arterial contractile reactivity and induces biventricular cardiac enlargement in the chicken embryo. *American Journal of Physiology-Regulatory, Integrative and Comparative Physiology* **287**, R642-R651 (2004).
- 4 Zoer, B. *et al.* Effects of prenatal hypoxia on pulmonary vascular reactivity in chickens prone to pulmonary hypertension. *J Physiol Pharmacol* **60**, 119-130 (2009).
- 5 Azzam, M. A. & Mortola, J. P. Organ growth in chicken embryos during hypoxia: implications on organ “sparing” and “catch-up growth”. *Respiratory physiology & neurobiology* **159**, 155-162 (2007).
- 6 Starr, V. J. & Dzialowski, E. M. Developing chicken cardiac muscle mitochondria are resistant to variations in incubation oxygen levels. *Curr Res Physiol* **5**, 151-157 (2022). <https://doi.org/10.1016/j.crphys.2022.03.001>
- 7 Ruijtenbeek, K. *et al.* Chronic hypoxia stimulates periarterial sympathetic nerve development in chicken embryo. *Circulation* **102**, 2892-2897 (2000).
- 8 Dusseau, J. W. & Hutchins, P. M. Hypoxia-induced angiogenesis in chick chorioallantoic membranes: a role for adenosine. *Respiration Physiology* **71**, 33-44 (1988). [https://doi.org/https://doi.org/10.1016/0034-5687\(88\)90113-2](https://doi.org/https://doi.org/10.1016/0034-5687(88)90113-2)
- 9 Stock, M. K. & Metcalfe, J. Modulation of growth and metabolism of the chick embryo by a brief (72-hr) change in oxygen availability. *The Journal of Experimental zoology. Supplement: Published Under Auspices of the American Society of Zoologists and the Division of Comparative Physiology and Biochemistry* **1**, 351-356 (1987).
- 10 Lindgren, I. & Altimiras, J. Sensitivity of organ growth to chronically low oxygen levels during incubation in Red Junglefowl and domesticated chicken breeds. *Poult Sci* **90**, 126-135 (2011). <https://doi.org/10.3382/ps.2010-00996>
- 11 Miller, S. L., Green, L. R., Peebles, D. M., Hanson, M. A. & Blanco, C. E. Effects of chronic hypoxia and protein malnutrition on growth in the developing chick. *Am J Obstet Gynecol* **186**, 261-267 (2002). <https://doi.org/10.1067/mob.2002.119629>
- 12 Rouwet, E. V. *et al.* Hypoxia induces aortic hypertrophic growth, left ventricular dysfunction, and sympathetic hyperinnervation of peripheral arteries in the chick embryo. *Circulation* **105**, 2791-2796 (2002). <https://doi.org/10.1161/01.cir.0000017497.47084.06>
- 13 Salinas, C. *et al.* Cardiac and vascular disease prior to hatching in chick embryos incubated at high altitude. *Journal of Developmental Origins of Health and Disease* **1**, 60-66 (2010).
- 14 Sharma, S. K. *et al.* Impact of hypoxia on early chick embryo growth and cardiovascular function. *Pediatric research* **59**, 116-120 (2006).
- 15 Tintu, A. *et al.* Hypoxia induces dilated cardiomyopathy in the chick embryo: mechanism, intervention, and long-term consequences. *PLoS One* **4**, e5155 (2009). <https://doi.org/10.1371/journal.pone.0005155>
- 16 Jonker, S. S., Giraud, G. D., Espinoza, H. M., Davis, E. N. & Crossley 2nd, D. A. Effects of chronic hypoxia on cardiac function measured by pressure-volume catheter in fetal chickens. *American Journal of Physiology-Regulatory, Integrative and Comparative Physiology* **308**, R680-R689 (2015).

- 17 Itani, N. *et al.* Protective effects of pravastatin on the embryonic cardiovascular system during hypoxic development. *The FASEB Journal* **34**, 16504-16515 (2020). <https://doi.org/https://doi.org/10.1096/fj.202001743R>
- 18 Itani, N., Skeffington, K. L., Beck, C., Niu, Y. & Giussani, D. A. Melatonin rescues cardiovascular dysfunction during hypoxic development in the chick embryo. *Journal of pineal research* **60**, 16-26 (2016).
- 19 Salinas, C. E., Villena, M., Blanco, C. E. & Giussani, D. A. Adrenocortical suppression in highland chick embryos is restored during incubation at sea level. *High Altitude Medicine & Biology* **12**, 79-87 (2011).
- 20 Giussani, D. A., Salinas, C. E., Villena, M. & Blanco, C. E. The role of oxygen in prenatal growth: studies in the chick embryo. *The Journal of Physiology* **585**, 911-917 (2007). <https://doi.org/https://doi.org/10.1113/jphysiol.2007.141572>
- 21 Itani, N., Skeffington, K. L., Beck, C. & Giussani, D. A. Sildenafil therapy for fetal cardiovascular dysfunction during hypoxic development: studies in the chick embryo. *The Journal of physiology* **595**, 1563-1573 (2017).
- 22 Botting, K. J. *et al.* Translatable mitochondria-targeted protection against programmed cardiovascular dysfunction. *Sci Adv* **6**, eabb1929 (2020). <https://doi.org/10.1126/sciadv.abb1929>
- 23 Skeffington, K. L. *et al.* Hypertension Programmed in Adult Hens by Isolated Effects of Developmental Hypoxia In Ovo. *Hypertension* **76**, 533-544 (2020). <https://doi.org/10.1161/hypertensionaha.120.15045>
- 24 Lindgren, I. & Altimiras, J. Chronic prenatal hypoxia sensitizes  $\beta$ -adrenoceptors in the embryonic heart but causes postnatal desensitization. *American Journal of Physiology-Regulatory, Integrative and Comparative Physiology* **297**, R258-R264 (2009).
- 25 Lindgren, I. & Altimiras, J. Prenatal hypoxia programs changes in  $\beta$ -adrenergic signaling and postnatal cardiac contractile dysfunction. *American Journal of Physiology-Regulatory, Integrative and Comparative Physiology* **305**, R1093-R1101 (2013).
- 26 Lindgren, I., Dane Crossley, I., Villamor, E. & Altimiras, J. Hypotension in the chronically hypoxic chicken embryo is related to the  $\beta$ -adrenergic response of chorioallantoic and femoral arteries and not to bradycardia. *American Journal of Physiology-Regulatory, Integrative and Comparative Physiology* **301**, R1161-R1168 (2011). <https://doi.org/10.1152/ajpregu.00458.2010>
- 27 Lourens, A., van den Brand, H., Heetkamp, M. J. W., Meijerhof, R. & Kemp, B. Effects of Eggshell Temperature and Oxygen Concentration on Embryo Growth and Metabolism During Incubation. *Poultry Science* **86**, 2194-2199 (2007). <https://doi.org/https://doi.org/10.1093/ps/86.10.2194>
- 28 Snyder, G. K., Black, C. P. & Birchard, G. F. Development and metabolism during hypoxia in embryos of high altitude Anser indicus versus sea level Branta canadensis geese. *Physiological Zoology* **55**, 113-123 (1982).
- 29 Snyder, G. K., Byers, R. L. & Kayar, S. R. Effects of hypoxia on tissue capillarity in geese. *Respiration physiology* **58**, 151-160 (1984).
- 30 Crossley, D. A. & Altimiras, J. Cardiovascular development in embryos of the American alligator Alligator mississippiensis: effects of chronic and acute hypoxia. *Journal of Experimental Biology* **208**, 31-39 (2005).
- 31 Eme, J., Crossley, D. A., 2nd & Hicks, J. W. Role of the left aortic arch and blood flows in embryonic American alligator (Alligator mississippiensis). *Journal of comparative physiology. B, Biochemical, systemic, and environmental physiology* **181**, 391-401 (2011). <https://doi.org/10.1007/s00360-010-0494-6>
- 32 Owerkowicz, T., Elsey, R. M. & Hicks, J. W. Atmospheric oxygen level affects growth trajectory, cardiopulmonary allometry and metabolic rate in the American alligator (Alligator mississippiensis). *Journal of Experimental Biology* **212**, 1237-1247 (2009). <https://doi.org/10.1242/jeb.023945>

- 33 Tate, K. B. *et al.* Periods of cardiovascular susceptibility to hypoxia in embryonic american alligators (*Alligator mississippiensis*). *American journal of physiology. Regulatory, integrative and comparative physiology* **310**, R1267-R1278 (2016). <https://doi.org/10.1152/ajpregu.00320.2015>
- 34 Eme, J., Altimiras, J., Hicks, J. W. & Crossley, D. A. Hypoxic alligator embryos: Chronic hypoxia, catecholamine levels and autonomic responses of in ovo alligators. *Comparative Biochemistry and Physiology Part A: Molecular & Integrative Physiology* **160**, 412-420 (2011). <https://doi.org/https://doi.org/10.1016/j.cbpa.2011.07.010>
- 35 Joyce, W., Miller, T. E., Elsey, R. M., Wang, T. & Crossley, D. A., 2nd. The effects of embryonic hypoxic programming on cardiovascular function and autonomic regulation in the American alligator (*Alligator mississippiensis*) at rest and during swimming. *J Comp Physiol B* **188**, 967-976 (2018). <https://doi.org/10.1007/s00360-018-1181-2>
- 36 Smith, B., Crossley, J. L., Elsey, R. M., Hicks, J. W. & Crossley, D. A., 2nd. Embryonic developmental oxygen preconditions cardiovascular functional response to acute hypoxic exposure and maximal  $\beta$ -adrenergic stimulation of anesthetized juvenile American alligators (*Alligator mississippiensis*). *J Exp Biol* **222** (2019). <https://doi.org/10.1242/jeb.205419>
- 37 Crossley, J. L. *et al.* Developmental oxygen preadapts ventricular function of juvenile American alligators, *Alligator mississippiensis*. *American Journal of Physiology-Regulatory, Integrative and Comparative Physiology* **323**, R739-R748 (2022). <https://doi.org/10.1152/ajpregu.00059.2022>
- 38 Galli, G. L. *et al.* Developmental plasticity of mitochondrial function in American alligators, *Alligator mississippiensis*. *Am J Physiol Regul Integr Comp Physiol* **311**, R1164-r1172 (2016). <https://doi.org/10.1152/ajpregu.00107.2016>
- 39 Smith, B. *et al.* Exposure to hypoxia during embryonic development affects blood flow patterns and heart rate in juvenile American alligators during digestion. *Comparative Biochemistry and Physiology Part A: Molecular & Integrative Physiology* **282**, 111440 (2023). <https://doi.org/https://doi.org/10.1016/j.cbpa.2023.111440>
- 40 Warburton, S. J., Hastings, D. & Wang, T. Responses to chronic hypoxia in embryonic alligators. *J Exp Zool* **273**, 44-50 (1995). <https://doi.org/10.1002/jez.1402730106>
- 41 Eme, J., Rhen, T. & Crossley, D. A., 2nd. Adjustments in cholinergic, adrenergic and purinergic control of cardiovascular function in snapping turtle embryos (*Chelydra serpentina*) incubated in chronic hypoxia. *J Comp Physiol B* **184**, 891-902 (2014). <https://doi.org/10.1007/s00360-014-0848-6>
- 42 Eme, J. *et al.* Plasticity of cardiovascular function in snapping turtle embryos (*Chelydra serpentina*): chronic hypoxia alters autonomic regulation and gene expression. *Am J Physiol Regul Integr Comp Physiol* **304**, R966-979 (2013). <https://doi.org/10.1152/ajpregu.00595.2012>
- 43 Eme, J., Tate, K. B., Rhen, T. & Crossley, D. A., 2nd. Cardiovascular responses to putative chemoreceptor stimulation of embryonic common snapping turtles (*Chelydra serpentina*) chronically incubated in hypoxia (10% O<sub>2</sub>). *Comp Biochem Physiol A Mol Integr Physiol* **259**, 110977 (2021). <https://doi.org/10.1016/j.cbpa.2021.110977>
- 44 Wearing, O. H., Eme, J., Rhen, T. & Crossley, D. A., 2nd. Phenotypic plasticity in the common snapping turtle (*Chelydra serpentina*): long-term physiological effects of chronic hypoxia during embryonic development. *Am J Physiol Regul Integr Comp Physiol* **310**, R176-184 (2016). <https://doi.org/10.1152/ajpregu.00293.2015>
- 45 Ruhr, I. M. *et al.* Developmental plasticity of cardiac anoxia-tolerance in juvenile common snapping turtles (*Chelydra serpentina*). *Proceedings of the Royal Society B: Biological Sciences* **286**, 20191072 (2019). <https://doi.org/doi:10.1098/rspb.2019.1072>

- 46 Ruhr, I. *et al.* Developmental programming of DNA methylation and gene expression patterns is associated with extreme cardiovascular tolerance to anoxia in the common snapping turtle. *Epigenetics & Chromatin* **14**, 42 (2021). <https://doi.org/10.1186/s13072-021-00414-7>
- 47 Galli, G. L. J., Ruhr, I. M., Crossley, J. & Crossley, D. A. The Long-Term Effects of Developmental Hypoxia on Cardiac Mitochondrial Function in Snapping Turtles. *Frontiers in Physiology* **12** (2021). <https://doi.org/10.3389/fphys.2021.689684>
- 48 Tate, K. B., Kohl, Z. F., Eme, J., Rhen, T. & Crossley, D. A., 2nd. Critical Windows of Cardiovascular Susceptibility to Developmental Hypoxia in Common Snapping Turtle (*Chelydra serpentina*) Embryos. *Physiol Biochem Zool* **88**, 103-115 (2015). <https://doi.org/10.1086/677683>
- 49 Kam, Y. C. Physiological effects of hypoxia on metabolism and growth of turtle embryos. *Respir Physiol* **92**, 127-138 (1993). [https://doi.org/10.1016/0034-5687\(93\)90033-7](https://doi.org/10.1016/0034-5687(93)90033-7)
- 50 Parker, S. L. & Dimkovikj, V. H. Effects of regional hypoxia and incubation temperature on growth, differentiation, heart mass, and oxygen consumption in embryos of the leopard gecko (*Eublepharis macularius*). *Comp Biochem Physiol A Mol Integr Physiol* **227**, 51-59 (2019). <https://doi.org/10.1016/j.cbpa.2018.09.006>
- 51 Tang, W., Zhao, B., Chen, Y. & Du, W. Reduced egg shell permeability affects embryonic development and hatchling traits in *Lycodon rufozonatum* and *Pelodiscus sinensis*. *Integr Zool* **13**, 58-69 (2018). <https://doi.org/10.1111/1749-4877.12269>
- 52 Cordero, G. A. *et al.* Physiological plasticity in lizard embryos exposed to high-altitude hypoxia. *Journal of Experimental Zoology Part A: Ecological and Integrative Physiology* **327**, 423-432 (2017). <https://doi.org/https://doi.org/10.1002/jez.2115>
- 53 Kouyoumdjian, L. *et al.* Transplanting gravid lizards to high elevation alters maternal and embryonic oxygen physiology, but not reproductive success or hatchling phenotype. *Journal of Experimental Biology* **222** (2019). <https://doi.org/10.1242/jeb.206839>
- 54 Souchet, J. *et al.* High temperatures limit developmental resilience to high-elevation hypoxia in the snake *Natrix maura* (Squamata: Colubridae). *Biological Journal of the Linnean Society* **132**, 116-133 (2020). <https://doi.org/10.1093/biolinnean/blaa182>
- 55 Souchet, J. *et al.* High-elevation hypoxia impacts perinatal physiology and performance in a potential montane colonizer. *Integrative Zoology* **15**, 544-557 (2020). <https://doi.org/https://doi.org/10.1111/1749-4877.12468>
- 56 Bagatto, B. Ontogeny of cardiovascular control in zebrafish (*Danio rerio*): effects of developmental environment. *Comp Biochem Physiol A Mol Integr Physiol* **141**, 391-400 (2005). <https://doi.org/10.1016/j.cbpb.2005.07.002>
- 57 Jacob, E., Drexel, M., Schwerte, T. & Pelster, B. Influence of hypoxia and of hypoxemia on the development of cardiac activity in zebrafish larvae. *American Journal of Physiology-Regulatory, Integrative and Comparative Physiology* **283**, R911-R917 (2002).
- 58 Barrionuevo, W. R., Fernandes, M. N. & Rocha, O. Aerobic and anaerobic metabolism for the zebrafish, *Danio rerio*, reared under normoxic and hypoxic conditions and exposed to acute hypoxia during development. *Braz J Biol* **70**, 425-434 (2010). <https://doi.org/10.1590/s1519-69842010000200027>
- 59 Kajimura, S., Aida, K. & Duan, C. Insulin-like growth factor-binding protein-1 (IGFBP-1) mediates hypoxia-induced embryonic growth and developmental retardation. *Proc Natl Acad Sci U S A* **102**, 1240-1245 (2005). <https://doi.org/10.1073/pnas.0407443102>
- 60 Ton, C., Stamatiou, D. & Liew, C.-C. Gene expression profile of zebrafish exposed to hypoxia during development. *Physiological Genomics* **13**, 97-106 (2003).



- 61 Cypher, A. D., Fetterman, B. & Bagatto, B. Vascular parameters continue to decrease post-exposure with simultaneous, but not individual exposure to BPA and hypoxia in zebrafish larvae. *Comp Biochem Physiol C Toxicol Pharmacol* **206-207**, 11-16 (2018). <https://doi.org/10.1016/j.cbpc.2018.02.002>
- 62 Moore, F. B., Hosey, M. & Bagatto, B. Cardiovascular system in larval zebrafish responds to developmental hypoxia in a family specific manner. *Front Zool* **3**, 4 (2006). <https://doi.org/10.1186/1742-9994-3-4>
- 63 Schwerte, T., Überbacher, D. & Pelster, B. Non-invasive imaging of blood cell concentration and blood distribution in hypoxic incubated zebrafish in vivo (*Danio rerio*). *J. Exp. Biol* **206**, 1299-1307 (2003).
- 64 Steele, S. L., Ekker, M. & Perry, S. F. Interactive effects of development and hypoxia on catecholamine synthesis and cardiac function in zebrafish (*Danio rerio*). *Journal of Comparative Physiology B* **181**, 527-538 (2011).
- 65 Yaqoob, N. & Schwerte, T. Cardiovascular and respiratory developmental plasticity under oxygen depleted environment and in genetically hypoxic zebrafish (*Danio rerio*). *Comparative Biochemistry and Physiology Part A: Molecular & Integrative Physiology* **156**, 475-484 (2010).
- 66 Steele, S. L. *et al.* Loss of M2 muscarinic receptor function inhibits development of hypoxic bradycardia and alters cardiac  $\beta$ -adrenergic sensitivity in larval zebrafish (*Danio rerio*). *American Journal of Physiology-Regulatory, Integrative and Comparative Physiology* **297**, R412-R420 (2009).
- 67 Ciuhandu, C. S., Stevens, E. D. & Wright, P. A. The effect of oxygen on the growth of *Oncorhynchus mykiss* embryos with and without a chorion. *Journal of Fish Biology* **67**, 1544-1551 (2005). <https://doi.org/https://doi.org/10.1111/j.1095-8649.2005.00856.x>
- 68 Johnston, E. F., Alderman, S. L. & Gillis, T. E. Chronic hypoxia exposure of trout embryos alters swimming performance and cardiac gene expression in larvae. *Physiological and Biochemical Zoology* **86**, 567-575 (2013).
- 69 Bianchini, K. & Wright, P. A. Hypoxia delays hematopoiesis: retention of embryonic hemoglobin and erythrocytes in larval rainbow trout, *Oncorhynchus mykiss*, during chronic hypoxia exposure. *Journal of Experimental Biology* **216**, 4415-4425 (2013). <https://doi.org/10.1242/jeb.083337>
- 70 Del Rio, A. M., Davis, B. E., Fangué, N. A. & Todgham, A. E. Combined effects of warming and hypoxia on early life stage Chinook salmon physiology and development. *Conservation Physiology* **7** (2019). <https://doi.org/10.1093/conphys/coy078>
- 71 Musa, S. M., Ripley, D. M., Moritz, T. & Shiels, H. A. Ocean warming and hypoxia affect embryonic growth, fitness and survival of small-spotted catsharks, *Scyliorhinus canicula*. *Journal of Fish Biology* **97**, 257-264 (2020). <https://doi.org/https://doi.org/10.1111/jfb.14370>
- 72 Sun, C.-F., Tao, Y., Jiang, X.-Y. & Zou, S.-M. IGF binding protein 1 is correlated with hypoxia-induced growth reduce and developmental defects in grass carp (*Ctenopharyngodon idellus*) embryos. *General and Comparative Endocrinology* **172**, 409-415 (2011). <https://doi.org/https://doi.org/10.1016/j.ygcen.2011.04.005>
- 73 Cadiz, L. *et al.* Early exposure to chronic hypoxia induces short- and long-term regulation of hemoglobin gene expression in European sea bass (*Dicentrarchus labrax*). *J Exp Biol* **220**, 3119-3126 (2017). <https://doi.org/10.1242/jeb.160713>
- 74 Vanderplancke, G. *et al.* Hypoxic episode during the larval period has long-term effects on European sea bass juveniles (*Dicentrarchus labrax*). *Marine biology* **162**, 367-376 (2015).
- 75 Wood, A. T., Clark, T. D., Andrewartha, S. J., Elliott, N. G. & Frappell, P. B. Developmental hypoxia has negligible effects on long-term hypoxia tolerance and aerobic metabolism of Atlantic salmon (*Salmo salar*). *Physiological and Biochemical Zoology* **90**, 494-501 (2017).

- 76 Herrera, E. A. *et al.* Morphological and Functional Alterations in the Aorta of the Chronically Hypoxic Fetal Rat. *Journal of Vascular Research* **49**, 50-58 (2012). <https://doi.org/10.1159/000330666>
- 77 Giussani, D. A. *et al.* Developmental Programming of Cardiovascular Dysfunction by Prenatal Hypoxia and Oxidative Stress. *PLOS ONE* **7**, e31017 (2012). <https://doi.org/10.1371/journal.pone.0031017>
- 78 Nuzzo, A. M. *et al.* Placental Adaptation to Early-Onset Hypoxic Pregnancy and Mitochondria-Targeted Antioxidant Therapy in a Rodent Model. *Am J Pathol* **188**, 2704-2716 (2018). <https://doi.org/10.1016/j.ajpath.2018.07.027>
- 79 Smith, K. M. *et al.* Chronic developmental hypoxia alters mitochondrial oxidative capacity and reactive oxygen species production in the fetal rat heart in a sex-dependent manner. *Journal of Pineal Research* **73**, e12821 (2022).
- 80 Rook, W., Johnson, C. D., Coney, A. M. & Marshall, J. M. Prenatal hypoxia leads to increased muscle sympathetic nerve activity, sympathetic hyperinnervation, premature blunting of neuropeptide Y signaling, and hypertension in adult life. *Hypertension* **64**, 1321-1327 (2014). <https://doi.org/10.1161/hypertensionaha.114.04374>
- 81 Xue, Q. & Zhang, L. Prenatal hypoxia causes a sex-dependent increase in heart susceptibility to ischemia and reperfusion injury in adult male offspring: role of protein kinase C epsilon. *J Pharmacol Exp Ther* **330**, 624-632 (2009). <https://doi.org/10.1124/jpet.109.153239>
- 82 Hansell, J. A. *et al.* Maternal melatonin: Effective intervention against developmental programming of cardiovascular dysfunction in adult offspring of complicated pregnancy. *Journal of Pineal Research* **72**, e12766 (2022). <https://doi.org/https://doi.org/10.1111/jpi.12766>
- 83 Tong, W., Xue, Q., Li, Y. & Zhang, L. Maternal hypoxia alters matrix metalloproteinase expression patterns and causes cardiac remodeling in fetal and neonatal rats. *Am J Physiol Heart Circ Physiol* **301**, H2113-2121 (2011). <https://doi.org/10.1152/ajpheart.00356.2011>
- 84 Morton, J. S., Rueda-Clausen, C. F. & Davidge, S. T. Mechanisms of endothelium-dependent vasodilation in male and female, young and aged offspring born growth restricted. *Am J Physiol Regul Integr Comp Physiol* **298**, R930-938 (2010). <https://doi.org/10.1152/ajpregu.00641.2009>
- 85 Xu, Y., Williams, S. J., O'Brien, D. & Davidge, S. T. Hypoxia or nutrient restriction during pregnancy in rats leads to progressive cardiac remodeling and impairs postischemic recovery in adult male offspring. *Faseb j* **20**, 1251-1253 (2006). <https://doi.org/10.1096/fj.05-4917fje>
- 86 Rueda-Clausen, C. F. *et al.* Effects of hypoxia-induced intrauterine growth restriction on cardiac siderosis and oxidative stress. *Journal of Developmental Origins of Health and Disease* **3**, 350-357 (2012). <https://doi.org/10.1017/S2040174412000219>
- 87 Walton, S. L., Singh, R. R., Tan, T., Paravicini, T. M. & Moritz, K. M. Late gestational hypoxia and a postnatal high salt diet programs endothelial dysfunction and arterial stiffness in adult mouse offspring. *The Journal of Physiology* **594**, 1451-1463 (2016). <https://doi.org/https://doi.org/10.1113/JP271067>
- 88 Hellgren, K. T., Premanandhan, H., Quinn, C. J., Trafford, A. W. & Galli, G. L. J. Sex-dependent effects of developmental hypoxia on cardiac mitochondria from adult murine offspring. *Free Radic Biol Med* **162**, 490-499 (2021). <https://doi.org/10.1016/j.freeradbiomed.2020.11.004>
- 89 Thompson, L. P. & Weiner, C. P. Effects of acute and chronic hypoxia on nitric oxide-mediated relaxation of fetal guinea pig arteries. *American Journal of Obstetrics and Gynecology* **181**, 105-111 (1999). [https://doi.org/https://doi.org/10.1016/S0002-9378\(99\)70444-8](https://doi.org/https://doi.org/10.1016/S0002-9378(99)70444-8)
- 90 Evans, L. C., Liu, H., Pinkas, G. A. & Thompson, L. P. Chronic hypoxia increases peroxynitrite, MMP9 expression, and collagen accumulation in fetal guinea pig hearts. *Pediatr Res* **71**, 25-31 (2012). <https://doi.org/10.1038/pr.2011.10>

- 91 Krause, B. J. *et al.* Adult vascular dysfunction in foetal growth-restricted guinea-pigs is associated with a neonate-adult switching in Nos3 DNA methylation. *Acta Physiologica* **227**, e13328 (2019). <https://doi.org/https://doi.org/10.1111/apha.13328>
- 92 Song, H., Polster, B. M. & Thompson, L. P. Chronic hypoxia alters cardiac mitochondrial complex protein expression and activity in fetal guinea pigs in a sex-selective manner. *American Journal of Physiology-Regulatory, Integrative and Comparative Physiology* (2021). <https://doi.org/10.1152/ajpregu.00004.2021>
- 93 Al-Hasan, Y. M. *et al.* Chronic hypoxia impairs cytochrome oxidase activity via oxidative stress in selected fetal Guinea pig organs. *Reprod Sci* **20**, 299-307 (2013). <https://doi.org/10.1177/1933719112453509>
- 94 Al-Hasan, Y. M., Pinkas, G. A. & Thompson, L. P. Prenatal Hypoxia Reduces Mitochondrial Protein Levels and Cytochrome c Oxidase Activity in Offspring Guinea Pig Hearts. *Reprod Sci* **21**, 883-891 (2014). <https://doi.org/10.1177/1933719113518981>
- 95 Thompson, L. P., Song, H. & Polster, B. M. Fetal Programming and Sexual Dimorphism of Mitochondrial Protein Expression and Activity of Hearts of Prenatally Hypoxic Guinea Pig Offspring. *Oxid Med Cell Longev* **2019**, 7210249 (2019). <https://doi.org/10.1155/2019/7210249>
- 96 Giussani, D. A. *et al.* Developmental programming of cardiovascular dysfunction by prenatal hypoxia and oxidative stress. *PLoS one* **7**, e31017 (2012).
- 97 Li, G., Bae, S. & Zhang, L. Effect of prenatal hypoxia on heat stress-mediated cardioprotection in adult rat heart. *Am J Physiol Heart Circ Physiol* **286**, H1712-1719 (2004). <https://doi.org/10.1152/ajpheart.00898.2003>
- 98 Li, G. *et al.* Effect of fetal hypoxia on heart susceptibility to ischemia and reperfusion injury in the adult rat. *J Soc Gynecol Investig* **10**, 265-274 (2003). [https://doi.org/10.1016/s1071-5576\(03\)00074-1](https://doi.org/10.1016/s1071-5576(03)00074-1)
- 99 Hansell, J. A. *et al.* Maternal melatonin: Effective intervention against developmental programming of cardiovascular dysfunction in adult offspring of complicated pregnancy. *J Pineal Res* **72**, e12766 (2022). <https://doi.org/10.1111/jpi.12766>
- 100 Brain, K. L. *et al.* Intervention against hypertension in the next generation programmed by developmental hypoxia. *PLoS Biol* **17**, e2006552 (2019). <https://doi.org/10.1371/journal.pbio.2006552>
- 101 Wang, L., Li, M., Huang, Z. & Wang, Z. The influence of hypoxia during different pregnancy stages on cardiac collagen accumulation in the adult offspring. *Biomed Res Int* **2014**, 419805 (2014). <https://doi.org/10.1155/2014/419805>
- 102 Walton, S. L. *et al.* Prenatal hypoxia leads to hypertension, renal renin-angiotensin system activation and exacerbates salt-induced pathology in a sex-specific manner. *Scientific reports* **7**, 8241-8241 (2017). <https://doi.org/10.1038/s41598-017-08365-4>
- 103 Rueda-Clausen, C. F., Morton, J. S. & Davidge, S. T. Effects of hypoxia-induced intrauterine growth restriction on cardiopulmonary structure and function during adulthood. *Cardiovascular Research* **81**, 713-722 (2008). <https://doi.org/10.1093/cvr/cvn341>
- 104 Salinas, C. E., Blanco, C. E., Villena, M. & Giussani, D. A. High-altitude hypoxia and echocardiographic indices of pulmonary hypertension in male and female chickens at adulthood. *Circ J* **78**, 1459-1464 (2014). <https://doi.org/10.1253/circj.cj-13-1329>
- 105 Zanardo, V. *et al.* Fetal aortic wall thickness: a marker of hypertension in IUGR children? *Hypertens Res* **36**, 440-443 (2013). <https://doi.org/10.1038/hr.2012.219>



- 106 Filogonio, R., Dubansky, B. D., Dubansky, B. H., Leite, C. A. C. & Crossley, D. A., 2nd. Prenatal hypoxia affects scaling of blood pressure and arterial wall mechanics in the common snapping turtle, *Chelydra serpentina*. *Comp Biochem Physiol A Mol Integr Physiol* **260**, 111023 (2021). <https://doi.org/10.1016/j.cbpa.2021.111023>
- 107 Thompson, L. P., Chen, L., Polster, B. M., Pinkas, G. & Song, H. Prenatal hypoxia impairs cardiac mitochondrial and ventricular function in guinea pig offspring in a sex-related manner. *Am J Physiol Regul Integr Comp Physiol* **315**, R1232-R1241 (2018). <https://doi.org/10.1152/ajpregu.00224.2018>
- 108 Crossley, J. L. *et al.* Hypoxic incubation at 50% of atmospheric levels shifts the cardiovascular response to acute hypoxia in American alligators, *Alligator mississippiensis*. *J Comp Physiol B* **193**, 545-556 (2023). <https://doi.org/10.1007/s00360-023-01510-8>
- 109 Niu, Y. *et al.* Maternal Allopurinol Prevents Cardiac Dysfunction in Adult Male Offspring Programmed by Chronic Hypoxia During Pregnancy. *Hypertension* **72**, 971-978 (2018). <https://doi.org/doi:10.1161/HYPERTENSIONAHA.118.11363>
- 110 Rueda-Clausen, C. F., Morton, J. S., Dolinsky, V. W., Dyck, J. R. & Davidge, S. T. Synergistic effects of prenatal hypoxia and postnatal high-fat diet in the development of cardiovascular pathology in young rats. *Am J Physiol Regul Integr Comp Physiol* **303**, R418-426 (2012). <https://doi.org/10.1152/ajpregu.00148.2012>
- 111 Rueda-Clausen, C. F., Morton, J. S., Lopaschuk, G. D. & Davidge, S. T. Long-term effects of intrauterine growth restriction on cardiac metabolism and susceptibility to ischaemia/reperfusion. *Cardiovasc Res* **90**, 285-294 (2011). <https://doi.org/10.1093/cvr/cvq363>
- 112 Ruhr, I. M. *et al.* Developmental plasticity of cardiac anoxia-tolerance in juvenile common snapping turtles (*Chelydra serpentina*). *Proceedings of the Royal Society B: Biological Sciences* **286**, 20191072 (2019). <https://doi.org/doi:10.1098/rspb.2019.1072>
- 113 Ding, H. *et al.* Hypoxia in utero increases the risk of pulmonary hypertension in rat offspring and is associated with vasopressin type-2 receptor upregulation. *Mol Med Rep* **22**, 4173-4182 (2020). <https://doi.org/10.3892/mmr.2020.11533>
- 114 Li, H. *et al.* Antenatal Hypoxia Affects Pulmonary Artery Contractile Functions via Downregulating L-type Ca(2+) Channels Subunit Alpha1 C in Adult Male Offspring. *J Am Heart Assoc* **10**, e019922 (2021). <https://doi.org/10.1161/jaha.120.019922>
